# Supplementary material
Source: PubMed Central journal article supplement (PMC1479600)
Supplement: 7400687-s1.pdf [file 7400687-s1.pdf]

## Supplementary Figure 1

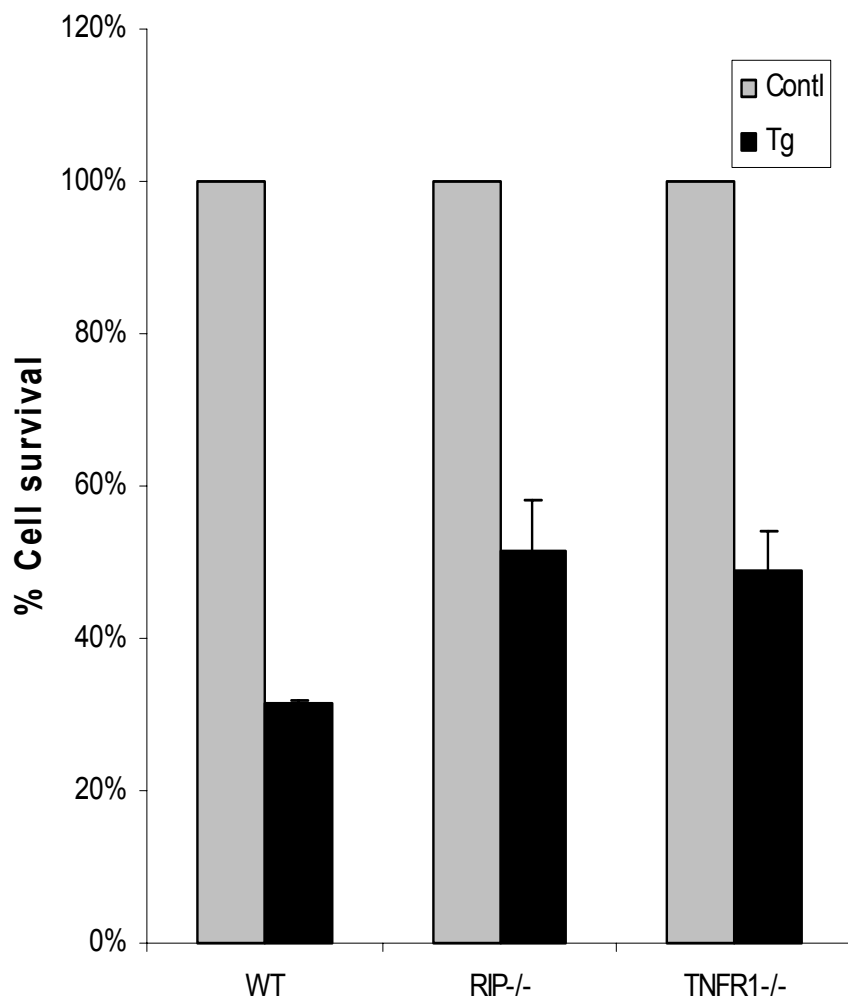

**Suppl. Figure 1. RIP and TNFR1 null cells are resistant to ER stress-induced cell death.**

**Wild-type fibroblast, RIP-/- and TNFR1-/- cells were treated with 2  $\mu$ M thapsigargin for 24 hrs, and cell viability was determined by MTT assay.**

## Suppl. Figure 2

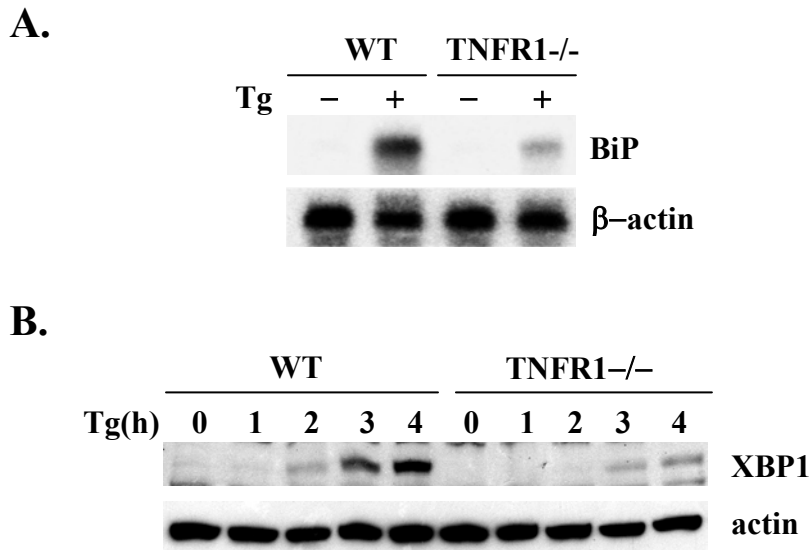

Suppl. Figure 2. Thapsigargin induced UPR in wt and TNFR1<sup>-/-</sup> MEF cells

- (A) Wild type and TNFR1<sup>-/-</sup> fibroblast cells were treated with 2  $\mu$ m thapsigargin for 4 hours. Total RNA was extracted. 10  $\mu$ g RNA samples were applied for Northern blot analysis. The blots were probed with the [ $\alpha$ -<sup>32</sup>P]-labeled BiP/GRP78 cDNA and  $\beta$ -actin cDNA.
- (B) Wild type and TNFR1<sup>-/-</sup> fibroblast cells were treated with 2  $\mu$ m thapsigargin at 0, 1, 2, 3, 4 hours. Cell extracts were used for Western blot. XBP1 and  $\beta$ -actin were detected.
